# Supplementary material for: Regression assumptions in clinical psychology research practice—a systematic review of common misconceptions
Source: PubMed Central journal article supplement (PMC5436580; doi:10.7717/peerj.3323), 2017-05-16
Supplement: peerj-05-3323-s003.pdf [file peerj-05-3323-s003.pdf]

## List of websites of all journals

- Q1.1 Annual Review of Clinical Psychology  
<http://www.annualreviews.org/toc/clinpsy/9/1>
- Q1.2 Clinical Psychology Review  
<https://www.journals.elsevier.com/clinical-psychology-review/>
- Q1.3 Journal of Consulting and Clinical Psychology  
Retrieved from PsycARTICLES:  
<http://www.apa.org/pubs/databases/psycarticles/coverage-list.aspx>
- Q2.1 International Psychogeriatrics  
<https://www.cambridge.org/core/journals/international-psychogeriatrics>
- Q2.2 Journal of Attention Disorders  
<http://journals.sagepub.com/loi/jada?expanded=2013>
- Q2.3 The American Journal of Drug and Alcohol Abuse  
<http://www.tandfonline.com/loi/iada20>
- Q3.1 Zeitschrift für Klinische Psychologie und Psychotherapie  
<http://econtent.hogrefe.com/loi/zkp?expanded=2013>
- Q3.2 Journal of Obsessive-Compulsive and Related Disorders  
<https://www.journals.elsevier.com/journal-of-obsessive-compulsive-and-related-disorders/>
- Q3.3 International Journal of Psychology and Psychological Therapy  
<http://www.ijpsy.com/>
- Q4.1 The Internet Journal of Mental Health  
<http://ispub.com/IJMH>
- Q4.2 Indian Journal of Psychological Medicine  
<http://www.ijpm.info/>
- Q4.3 Behaviour Change  
<https://www.cambridge.org/core/journals/behaviour-change/all-issues>
